# Supplementary material for: Repurposed Drugs That Activate Autophagy in Filarial Worms Act as Effective Macrofilaricides
Source: MDPI journal article supplement (doi:10.3390/pharmaceutics16020256), 2024-02-09
Supplement: s1 [file s1]

**Table S1. Autophagy inducing compounds used in this study.**

| Name                                | Catalog number | Company                                  | Purity  | Structure                                                                             |
|-------------------------------------|----------------|------------------------------------------|---------|---------------------------------------------------------------------------------------|
| FK866                               | ALX-270-501    | Enzo Life Sciences,<br>Farmingdale NY    | ≥98%    | 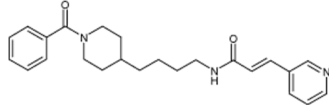   |
| TTFA<br>(2-Thenoyltrifluoroacetone) | 15517          | Cayman Chemical<br>Company, Ann Arbor MI | ≥98%    |    |
| Imatinib                            | ALX-270-492    | Enzo Life Sciences,<br>Farmingdale NY    | ≥98%    |    |
| Metformin-HCl                       | ALX-270-432    | Enzo Life Sciences,<br>Farmingdale NY    | ≥97%    |    |
| Minoxidil                           | M4145          | Sigma,<br>St. Louis MO                   | ≥99%    |    |
| PI-103                              | S1038          | Selleckchem,<br>Houston TX               | ≥99.59% |    |
| Clonidine HCl                       | S2458          | Selleckchem,<br>Houston TX               | ≥99.97% |   |
| Niclosamide                         | 481909         | Sigma,<br>St. Louis MO                   | ≥97%    |  |
| Rottlerin                           | ALX-350-075    | Enzo Life Sciences,<br>Farmingdale NY    | ≥98%    |  |
